# Supplementary material for: Containment of future waves of COVID-19: simulating the impact of different policies and testing capacities for contact tracing, testing, and isolation
Source: PubMed Central journal article supplement — medRxiv. 2020 Jun 7:2020.06.05.20123372. Preprint. [Version 1] doi: 10.1101/2020.06.05.20123372 (PMC7302294; doi:10.1101/2020.06.05.20123372), 2020-06-07
Supplement: NIHPP2020.06.05.20123372-supplement-1.pdf [file NIHPP2020.06.05.20123372-supplement-1.pdf]

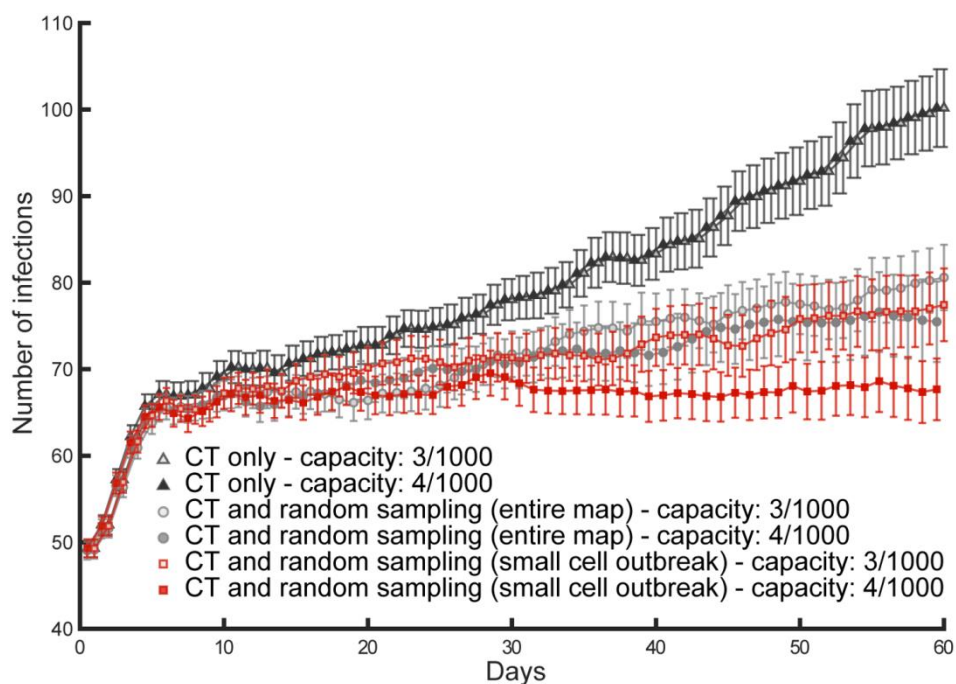

544

545 **Supplementary figure 1. Increased testing capacity and testing policies.** These simulations  
546 illustrate the effects of an increase of testing capacity from 3 to 4 tests per thousand agents, jointly  
547 with 20% contact tracing and testing (CT) efficacy. The contact tracing and testing process, when  
548 considered alone (filled triangles for high capacity and empty triangles for high capacity), does not  
549 exhaust the initial testing capacity due to low efficacy, so that an increase in capacity is ineffective  
550 as it simply increases the number of unused tests per day. Instead, improved containment of the  
551 disease transmission is found both for contact tracing and testing jointly with random sampling over  
552 the entire population (filled circles for high capacity and empty squares for low capacity), as well as  
553 for contact tracing and testing jointly with random sampling over a small sector centred on the most  
554 recent outbreak (filled squares for high capacity and empty squares for low capacity). The latter  
555 mixed policy succeeds in keeping the number of daily infections constant ( $R_{\text{effective}} \approx 1$ ), once the  
556 capacity is increased.
